# Supplementary material for: Coix Seed Consumption Affects the Gut Microbiota and the Peripheral Lymphocyte Subset Profiles of Healthy Male Adults
Source: MDPI journal article supplement (doi:10.3390/nu13114079), 2021-11-15
Supplement: s1 [file s1]

**A**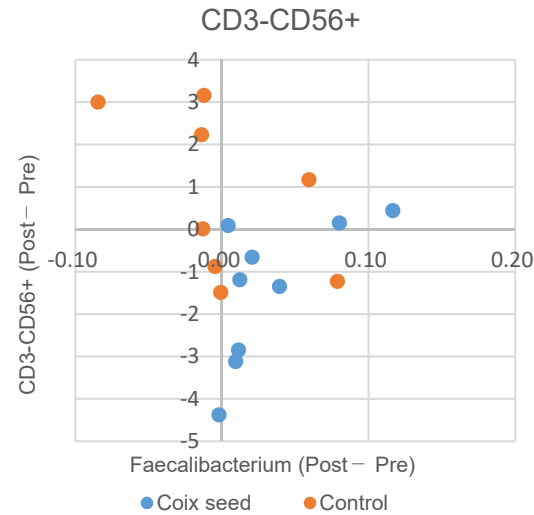**B**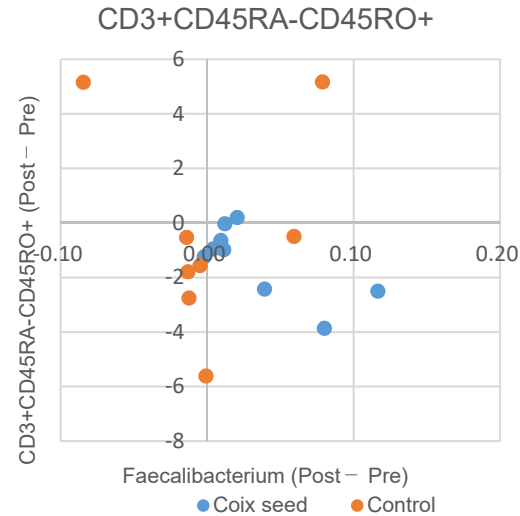**C**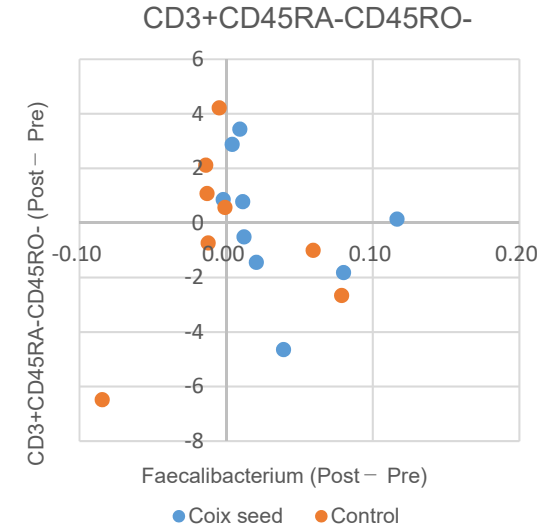

**Supplementary Figure S1:** Correlation of the changes in gut *Faecalibacterium* abundance with the changes in peripheral lymphocyte subsets (namely, A: CD3<sup>-</sup>CD56<sup>+</sup>; B: CD3<sup>+</sup>CD45RA<sup>-</sup>CD45RO<sup>+</sup>; C: CD3<sup>+</sup>CD45RA<sup>-</sup>CD45RO<sup>-</sup>) in the participants of the CS and the CN group, before and after the intervention described in the study
